# Supplementary material for: A hybrid fuzzy logic–Random Forest model to predict psychiatric treatment order outcomes: an interpretable tool for legal decision support
Source: Front Artif Intell. 2025 Jun 17;8:1606250. doi: 10.3389/frai.2025.1606250 (PMC12209287; doi:10.3389/frai.2025.1606250)
Supplement: Supplementary file 2 [file Table_1.XLSX]

## Sheet: Sheet1
Date	Was the defendant represented?	If represented was it by legal aid?	Age of the defendant	Sex of the defendant	Main diagnosis of the defendant	Other diagnoses listed	Symptoms and signs (be as detailed as possible)	Was substance use reported?	If so, what are the substances listed (please be as detailed as possible)	Was it a treatment order request or was it treatment and housing?	What treatment is requested (be as detailed as possible)	What are the accessory requests (eg blood samples, urinary tests, ECT, etc) (be as detailed as possible)	What was the time (in years) requested by the treating team (if presented)	Was the request accepted or denied?	If accepted, was it partially or entirely?	Number of time granted (in years)
31 janvier 2024	Yes	Not specified	37	Male	Treatment-resistant schizophrenia	Personality issues (oppositional, immature, cognitive difficulties)	Instability, non-adherence to treatment, recent amphetamine use, agitation, delusions, paranoia, delusions of reference, auditory hallucinations, somatic symptoms (weird sensation in belly/genitals), no insight, sexualized behavior, inappropriate speech	Yes	Amphetamines, alcohol, tobacco	Treatment order	Combination of antipsychotics (Clozapine, Invega Sustenna), mood stabilizer (Epival), forced medication administration, medication in injection or oral form	Medical and nursing follow-up, scans, ECGs, blood tests, vital signs monitoring, urine drug screening	2	Accepted	Entirely	2
31 janvier 2024	Yes	Not specified	29	Male	Schizophrenia	None explicitly listed; schizoaffective disorder considered	Auditory hallucinations, cosmological delusions, agitation, shouting from balcony, danger to self or others, confusion, telepathic claims, ideas of malice, incoherent speech, lack of autocritique, confused life projects	No	N/A	Treatment order	Antipsychotic injection (Abilify Maintena), optionally other antipsychotics (Clopixol depot, Invega Sustenna), optional antidepressants or mood stabilizers (not authorized), supportive follow-ups (SIM and SIV)	Psychiatric exams, blood/urine samples, physical exams, follow-up in community, communications with family, enforcement with peace officers	3	Accepted	Partially	1
26 janvier 2024	Yes	Not specified	25	Male	Schizoaffective disorder (depressive type)	Cognitive impairments, possible cannabis use disorder	Poor judgment, disorganized speech, suicidal ideation (no attempt), inappropriate behavior, aggressive during police intervention, delusions, auditory hallucinations, poor insight, manipulation by mother, poor treatment adherence	Yes	Cannabis (suspected)	Treatment order	Clozapine (oral, preferred), fallback to injectable antipsychotics (Invega Sustenna), mood stabilizer for depressive effects, outpatient follow-up	Blood and urine tests, physical exams, community follow-up, hospitalizations up to 30 days if needed, family communication authorization	3	Accepted	Partially	2
24 janvier 2024	Yes	Not specified	46	Male	Schizophrenia	None explicitly mentioned	Repeated noncompliance with treatment, difficulty with social integration, paranoia, grandiose delusions, religious delusions, inappropriate behavior, refusal to engage with services, loss of autonomy, no insight into illness	No	N/A	Treatment order	Antipsychotic medications including long-acting injectables (Abilify Maintena), option for mood stabilizers and other agents depending on response	Medical follow-up, psychiatric monitoring, blood work, urine tests, physical exams	3	Accepted	Partially	2
22 janvier 2024	Yes	Yes	41	Female	Schizoaffective disorder	Trauma-related symptoms	Delusions of persecution, religious delusions, disorganized behavior, psychotic breakdowns, non-adherence to medication, voices commanding self-harm, absence of insight, low autonomy, past trauma, suicidal ideation	Yes	Cannabis, occasional alcohol	Treatment and housing	Antipsychotics (Invega Trinza), mood stabilizers if required, enforced compliance with prescribed regimen	Psychiatric monitoring, blood work, urine testing, ECG, support housing placement	2	Accepted	Entirely	2
23 janvier 2024	Yes	Not specified	32	Male	Paranoid schizophrenia	Possible antisocial traits	Delusions of persecution, aggression, poor impulse control, history of violence, hallucinations, paranoia, poor medication adherence, repeated hospitalizations	Yes	Alcohol, cannabis, cocaine (past use)	Treatment order	Antipsychotic injections (Risperdal Consta), oral medications if tolerated, possible combination with anxiolytics	Routine labs, psychiatric monitoring, urine screens, police support if noncompliant	1	Accepted	Entirely	1
20 janvier 2024	Yes	Yes	38	Female	Bipolar disorder with psychotic features	Possible borderline personality disorder	Manic episodes, disorganized speech, auditory hallucinations, paranoia, pressured speech, flight of ideas, impulsivity, history of self-harm, no insight into illness	Yes	Alcohol and cannabis	Treatment order	Mood stabilizers (Lithium), antipsychotics (Abilify Maintena), possible antidepressants depending on symptomatology	Blood monitoring (especially for Lithium), urine drug screens, vital signs monitoring, psychiatric evaluations	2	Accepted	Entirely	2
19 janvier 2024	Yes	Not specified	53	Male	Schizophrenia	Hypertension (medical comorbidity)	Auditory hallucinations, religious delusions, lack of hygiene, delusional beliefs about surveillance, refusal to take medication, no awareness of illness, disorganized behavior	No	N/A	Treatment order	Antipsychotics including Invega Sustenna and possible Clozapine, medication compliance enforced, with regular follow-ups	Blood tests, psychiatric monitoring, ECG, physical assessments, vital signs checks	1	Accepted	Entirely	1
18 janvier 2024	Yes	Not specified	47	Female	Schizoaffective disorder	Cognitive deficits	Paranoia, auditory hallucinations, delusions, noncompliance with treatment, agitation, confusion, lack of insight, suspiciousness	Yes	Tobacco, alcohol (moderate use)	Treatment order	Invega Trinza (long-acting antipsychotic), mood stabilizer if needed, monitoring of side effects and adherence	Psychiatric follow-up, lab work (blood, urine), ECG, and nurse monitoring	2	Accepted	Entirely	2
16 janvier 2024	Yes	Yes	31	Male	Paranoid schizophrenia	Possible delusional disorder	Delusional beliefs about being followed and surveilled, auditory hallucinations, resistance to care, poor insight, social withdrawal, fear of poisoning	No	N/A	Treatment order	Antipsychotic injections (Risperidone long-acting), optional switch to Clozapine if ineffective	Blood tests, psychiatric evaluations, safety monitoring	2	Accepted	Entirely	2
14 janvier 2024	Yes	Not specified	45	Female	Schizoaffective disorder	History of PTSD and childhood trauma	Auditory hallucinations, intense fear, flashbacks, paranoia, frequent emotional dysregulation, suicidal ideation, refusal of medication	Yes	Alcohol, benzodiazepines (reported misuse)	Treatment order	Invega Sustenna injections, mood stabilizers if needed, intensive psychosocial follow-up	Blood panels, urine toxicology, ECGs, psychiatric assessments, safety planning	3	Accepted	Partially	2
12 janvier 2024	Yes	Yes	27	Male	Schizophrenia with disorganized features	Intellectual disability (mild)	Disorganized thought and speech, social withdrawal, inability to maintain routines, hallucinations, poor hygiene, poor insight, obsessive behaviors	No	N/A	Treatment and housing	Long-acting injectable antipsychotic (Abilify Maintena), occupational therapy and social skills training	Nursing assessments, blood work, community supervision, supported housing	1	Accepted	Entirely	1
10 janvier 2024	Yes	Yes	50	Female	Paranoid schizophrenia	None specified	Fixed delusions, auditory hallucinations, hostility towards staff, rejection of diagnosis, consistent noncompliance with treatment, disorganized thoughts, suspicion toward caregivers	No	N/A	Treatment order	Invega Trinza long-acting antipsychotic, switch to Clozapine if unresponsive	Blood work, ECGs, medical follow-up, psychiatric reviews	2	Accepted	Entirely	2
8 janvier 2024	Yes	Not specified	34	Male	Schizophrenia	Possible substance-induced psychosis	Bizarre behavior, paranoia, delusions of control, agitation, verbal aggression, history of hospitalization, non-adherence to treatment, no insight	Yes	Cannabis, possible cocaine	Treatment order	Risperdal Consta injection, optional switch to another depot antipsychotic if needed	Urine drug tests, blood work, psychiatric supervision	2	Accepted	Partially	1
5 janvier 2024	Yes	Yes	40	Male	Schizoaffective disorder (manic type)	Personality disorder traits	Grandiosity, pressure of speech, racing thoughts, impulsivity, sexual disinhibition, poor boundaries, aggression, hyperactivity	Yes	Cocaine, alcohol, cannabis	Treatment order	Combination of antipsychotic (Invega Sustenna), mood stabilizer, benzodiazepines for agitation	Urine screening, liver function testing, vital signs monitoring	3	Accepted	Partially	2
3 janvier 2024	Yes	Yes	36	Female	Schizoaffective disorder	Diabetes (medical comorbidity)	Visual and auditory hallucinations, delusions, paranoia, non-adherence to treatment, impaired judgment, agitation, refusal to collaborate with services	Yes	Alcohol, cannabis (past history)	Treatment order	Invega Sustenna injections, mood stabilizer if needed, outpatient psychiatric follow-up	Blood glucose monitoring, labs, urine tests, psychiatric evaluation	2	Accepted	Entirely	2
2 janvier 2024	Yes	Not specified	60	Male	Schizophrenia	Cognitive decline (possible dementia)	Forgetfulness, paranoia, disorganized speech, poor hygiene, deterioration in functioning, repeated missed appointments	No	N/A	Treatment and housing	Antipsychotic medication (Risperdal), assistance with daily functioning, home care support	Blood testing, nursing supervision, home visits	1	Accepted	Entirely	1
2 janvier 2024	Yes	Yes	22	Male	First-episode psychosis	Substance use disorder	Auditory hallucinations, incoherent speech, religious delusions, social withdrawal, suicidal thoughts, agitation	Yes	Cannabis, alcohol, possibly methamphetamines	Treatment order	Low-dose antipsychotics (Risperidone), addiction counseling, close psychiatric monitoring	Urine drug screens, blood work, psychiatric interviews	2	Accepted	Partially	1
2 janvier 2024	Yes	Yes	44	Female	Bipolar I disorder (manic with psychotic features)	None specified	Pressured speech, racing thoughts, delusions of grandeur, disinhibited behavior, aggression, refusal of care	Yes	Cannabis, alcohol	Treatment order	Mood stabilizer (Lithium), antipsychotic (Abilify Maintena), supportive therapy	ECGs, blood lithium levels, psychiatric follow-up	3	Accepted	Entirely	3
29 février 2024	Yes	Yes	20	Male	Schizophrenia (primary psychotic disorder)	Cannabis-induced psychosis (past episode)	Hallucinations, delusions, paranoia, social withdrawal, poor hygiene, disorganized thought, lack of insight, concrete thinking, suspicion, auditory hallucinations, sensitivity to light/smell, carrying weapons for protection, urinating in containers	Yes	Cannabis (historic use, suspected current avoidance)	Treatment order	Aripiprazole and Risperidone (injectables), initial hospitalization to observe effects, multidisciplinary follow-up (social worker, psychotherapist, nurse, etc.)	Blood tests, urine drug screening, vital signs monitoring, scans	1	Accepted	Entirely	1
28 février 2024	Yes	Yes	70	Male	Delusional disorder / unspecified psychotic disorder	Diabetes, atherosclerotic heart disease	Persecution delusions, grandiosity, intense messaging to family, belief in theft of patents, hallucinations, refusal of all psychiatric and physical medication, unpredictable behavior	No		Treatment order	Antipsychotic (Maintena), via injection or oral, with flexibility in dose and form	Blood work, medical and psychiatric follow-up, hospital stay up to 3 weeks per 6 weeks if decompensated	5	Accepted	Entirely	5
26 février 2024	Yes	Yes	25	Male	Bipolar I disorder (psychotic mania)	None specified	Delusions of grandeur (believes he is chosen or God), prior plan to build a bomb, paranoia, bathing in cold river for spiritual reasons, refusal to attend follow-ups, repeated manic episodes triggered with or without drugs	Yes	Cocaine, psychostimulants (past)	Treatment order	Aripiprazole Maintena (400 mg IM monthly), Lithium (600 mg BID, adjusted to lithémies 0.6–0.9), 10-day hospital delegation, multidisciplinary follow-up	Lithium level testing, renal and thyroid function, blood draws, psychiatric assessments	1	Accepted	Entirely	1
23 février 2024	Yes	Not specified	46	Male	Schizophrenia	Substance use disorder	Delusions, disorganized behavior, social withdrawal, lack of insight, agitation, verbal aggression, refusal of medication	Yes	Alcohol, cannabis	Treatment order	Antipsychotic (Invega Sustenna), nursing and psychosocial follow-up	Blood tests, ECGs, urine screening, psychiatric assessment	2	Accepted	Entirely	2
20 février 2024	Yes	Yes	54	Female	Bipolar disorder	Substance use disorder	Manic episodes, pressured speech, grandiose delusions, flight of ideas, impulsivity, irritability, lack of judgment	Yes	Cannabis, cocaine	Treatment order	Abilify Maintena injections, mood stabilizer, support from SIM team	Blood panels, urine tests, vital signs, outpatient follow-up	2	Accepted	Partially	1
19 février 2024	Yes	Not specified	35	Male	Schizoaffective disorder	None explicitly mentioned	Disorganized behavior, hallucinations, paranoia, suspicion, non-compliance with treatment, impaired functioning	Yes	Alcohol, cannabis	Treatment order	Invega Sustenna injectable, psychiatric monitoring, community nurse support	ECGs, labs, psychiatric assessments	3	Accepted	Partially	2
16 février 2024	Yes	Yes	42	Female	Schizoaffective disorder	PTSD	Auditory hallucinations, emotional instability, paranoid delusions, agitation, self-isolation, inability to care for herself	Yes	Cannabis, alcohol	Treatment and housing	Invega Trinza injections, case management support, structured housing environment	Blood work, urine toxicology, ECGs, psychiatric assessments	2	Accepted	Entirely	2
15 février 2024	Yes	Not specified	30	Male	Paranoid schizophrenia	History of substance-induced psychosis	Persecutory delusions, aggression, verbal threats, disorganized thoughts, non-adherence to medication, repeated hospitalizations	Yes	Cocaine, cannabis	Treatment order	Risperdal Consta injections, psychiatric team monitoring	Urine drug screening, blood tests, peace officer support if required	3	Accepted	Partially	1
13 février 2024	Yes	Yes	38	Female	Bipolar disorder with psychotic features	None reported	Mood swings, agitation, disorganized speech, impulsivity, delusions of persecution	No		Treatment order	Abilify Maintena injections, mood stabilizer as needed, outpatient support	Blood tests, ECG, psychiatric follow-up, community nurse visits	2	Accepted	Entirely	2
9 février 2024	Yes	Yes	29	Male	Schizophrenia	Cannabis use disorder	Paranoia, auditory hallucinations, withdrawal, disorganized behavior, refusal to engage with services	Yes	Cannabis	Treatment and housing	Invega Sustenna injections, housing in supervised environment, support from psychosocial intervention team	Blood work, urine drug screens, psychiatric monitoring	2	Accepted	Entirely	2
7 février 2024	Yes	Yes	33	Female	Schizoaffective disorder	None specified	Delusional beliefs, emotional instability, anxiety, fear of harm from others, verbal outbursts, poor social functioning	Yes	Alcohol, cannabis	Treatment order	Aripiprazole injections, therapy support, case management	Urine testing, liver function monitoring, community nurse involvement	2	Accepted	Entirely	2
6 février 2024	Yes	Not specified	51	Male	Paranoid schizophrenia	Hypertension	Paranoia, delusions of persecution, refusal to cooperate with treatment, verbal aggression, distrust of caregivers	No		Treatment order	Risperdal injections, clinical monitoring, safety precautions	ECGs, blood pressure monitoring, psychiatric evaluations	3	Accepted	Partially	1
5 février 2024	Yes	Yes	27	Female	Schizoaffective disorder	Possible borderline traits	Auditory hallucinations, crying episodes, poor sleep, self-isolation, disorganized thinking, aggression during crisis	Yes	Alcohol, cannabis	Treatment and housing	Aripiprazole long-acting injection, individual therapy, structured housing environment	Urine toxicology, psychiatric follow-up, crisis planning	2	Accepted	Entirely	2
2 février 2024	Yes	Yes	63	Male	Paranoid schizophrenia	Substance use disorder (in remission)	Delusions of persecution, lack of insight, disorganized speech, isolation, neglect of hygiene	Yes (in remission)	Cannabis, alcohol	Treatment order	Invega Sustenna, community psychiatric support, relapse prevention planning	Blood monitoring, psychiatric reviews, urine testing	3	Accepted	Partially	1
1 février 2024	Yes	Yes	48	Male	Bipolar I disorder	Personality disorder traits	Delusions of grandeur, pressured speech, agitation, overactivity, impulsivity, mood swings, insomnia	Yes	Cannabis, alcohol, occasional stimulants	Treatment order	Mood stabilizer (Lithium), antipsychotic (Abilify Maintena), support from SIM team	Lithium blood levels, ECG, urine testing	2	Accepted	Entirely	2
31 janvier 2024	Yes	Not specified	41	Female	Schizoaffective disorder	Possible borderline personality disorder	Auditory hallucinations, disorganized behavior, emotional lability, paranoia, verbal outbursts, history of non-adherence	Yes	Cannabis, alcohol	Treatment and housing	Invega Sustenna, case management, structured living environment	Urine drug testing, psychiatric evaluation, housing placement	2	Accepted	Entirely	2
30 janvier 2024	Yes	Yes	36	Male	Schizophrenia	None specified	Delusions of persecution, hallucinations, neglect of hygiene, social withdrawal, history of medication refusal	No	N/A	Treatment order	Long-acting injectable antipsychotic (Risperdal), psychiatric follow-up	Blood tests, regular psychiatric consultations	2	Accepted	Entirely	2
27 mars 2024	Yes	Yes	35	Male	Schizophrenia	Substance use disorder	Auditory hallucinations, delusional thoughts, paranoid behavior, history of violence, lack of insight, repeated psychiatric hospitalizations	Yes	Cannabis, alcohol	Treatment order	Invega Sustenna injection, support from SIM team, community follow-up	Blood testing, urine toxicology, ECG, psychiatric evaluation	2	Accepted	Entirely	2
26 mars 2024	Yes	Yes	29	Female	Schizoaffective disorder	Cognitive deficits	Auditory hallucinations, delusions, impaired concentration, disorganized thoughts, emotional instability, refusal of medication, impaired daily functioning	Yes	Cannabis, alcohol	Treatment and housing	Invega Trinza injection, mood stabilizer, community support housing, occupational therapy	Blood and urine screening, medical exams, psychiatric monitoring	3	Accepted	Entirely	3
25 mars 2024	Yes	Not specified	44	Male	Paranoid schizophrenia	None reported	Delusions of persecution, verbal aggression, disorganized behavior, non-adherence to treatment, repeated relapses, social withdrawal	Yes	Cannabis, alcohol	Treatment order	Invega Sustenna injections, psychiatric follow-up, peace officer intervention if necessary	Urine screening, blood testing, follow-up appointments	2	Accepted	Partially	1
22 mars 2024	Yes	Yes	52	Female	Bipolar disorder with psychotic features	Hypertension	Mood swings, delusional thinking, sleep disturbance, disorganized speech, episodes of elevated mood, poor insight into condition	No		Treatment order	Mood stabilizers (Lithium), antipsychotics, psychiatric evaluations, crisis planning	Blood lithium level monitoring, ECGs, psychiatric follow-up	2	Accepted	Entirely	2
21 mars 2024	Yes	Yes	39	Male	Schizophrenia	Substance use disorder (in remission)	Delusions of persecution, refusal of medication, poor hygiene, social isolation, suspicion toward family and professionals	Yes (in remission)	Cannabis, alcohol (past use)	Treatment order	Risperidone injections, peace officer assistance if needed, psychiatric evaluations	Urine tests, blood work, medical supervision	1	Accepted	Entirely	1
20 mars 2024	Yes	Yes	24	Female	Bipolar disorder	Cannabis use disorder	Delusions of grandeur, irritability, insomnia, impulsive spending, disinhibition, mood instability	Yes	Cannabis	Treatment and housing	Abilify Maintena, mood stabilizers, outpatient monitoring, supervised housing	Blood panels, toxicology screens, psychiatric evaluation	2	Accepted	Partially	1
19 mars 2024	Yes	Yes	43	Male	Schizophrenia	Intellectual disability (mild)	Hallucinations, delusions, poor understanding of condition, resistance to care, increased vulnerability, verbal outbursts	No		Treatment order	Invega Sustenna, community nurse visits, psychiatric follow-up	Routine lab work, ECGs, psychiatric assessments	2	Accepted	Entirely	2
18 mars 2024	Yes	Yes	46	Female	Schizoaffective disorder	None reported	Paranoia, social withdrawal, fixed delusional beliefs, visual hallucinations, refusal of medication, difficulty functioning independently	No		Treatment and housing	Invega Trinza injections, structured housing support, crisis planning	Blood and urine screening, psychiatric follow-up, nursing supervision	3	Accepted	Entirely	3
15 mars 2024	Yes	Not specified	51	Male	Schizophrenia	None specified	Disorganized thoughts, paranoia, grandiose delusions, hostility toward staff, noncompliance with treatment, poor insight	Yes	Cannabis, alcohol	Treatment order	Antipsychotic injection (Invega), continued outpatient support	Urine drug screens, lab work, psychiatric evaluations	2	Accepted	Partially	1
14 mars 2024	Yes	Yes	40	Female	Bipolar disorder	PTSD	Rapid speech, irritability, emotional dysregulation, traumatic flashbacks, difficulties with daily tasks, refusal to take medication	Yes	Cannabis	Treatment and housing	Abilify injection, mood stabilizer, trauma-focused therapy, community housing	Urine testing, psychological counseling, psychiatric monitoring	3	Accepted	Entirely	3
13 mars 2024	Yes	Yes	33	Male	Schizoaffective disorder	None reported	Paranoia, hallucinations, delusions of being targeted, history of aggression, social withdrawal, poor treatment adherence	Yes	Cannabis, alcohol	Treatment order	Invega Sustenna, monitoring by SIM team, follow-up by psychiatric nurse	Lab work, urine drug screens, mental health assessment	2	Accepted	Entirely	2
11 mars 2024	Yes	Yes	28	Female	Bipolar I disorder	None specified	Manic episode with elevated mood, grandiosity, sleep disturbance, risky financial behavior, loud and rapid speech, delusional thoughts	Yes	Alcohol	Treatment order	Mood stabilizer, Abilify injection, occupational therapy support	Lithium levels, psychiatric assessments, toxicology	1	Accepted	Entirely	1
8 mars 2024	Yes	Yes	50	Male	Paranoid schizophrenia	None specified	Delusions of persecution, irritability, refusal of medication, poor insight, disorganized behavior, verbal aggression	Yes	Alcohol, cannabis	Treatment order	Invega Sustenna, community nurse monitoring, medication supervision	Urine testing, psychiatric evaluation, peace officer support if needed	2	Accepted	Partially	1
6 mars 2024	Yes	Yes	61	Female	Schizoaffective disorder	Diabetes	Visual hallucinations, disorganized behavior, delusional beliefs, emotional outbursts, poor self-care, refusal of medical treatments	No		Treatment and housing	Risperdal injection, supportive housing, multidisciplinary follow-up	Blood sugar monitoring, urine testing, psychiatric monitoring	3	Accepted	Entirely	3
4 mars 2024	Yes	Not specified	36	Male	Schizophrenia	None listed	Delusional ideas, aggressive behavior, poor judgment, social withdrawal, refusal of care, verbal altercations	Yes	Cannabis	Treatment order	Abilify Maintena, psychiatric supervision, SIM team support	Urine testing, blood work, psychiatric evaluations	2	Accepted	Entirely	2
1 mars 2024	Yes	Yes	47	Female	Bipolar disorder with psychotic features	None reported	Mania, racing thoughts, flight of ideas, grandiosity, distractibility, delusions of being followed	Yes	Cannabis	Treatment and housing	Abilify Maintena, psychotherapy, social support services	Urine toxicology, mood evaluations, psychiatric consultations	1	Accepted	Entirely	1
29 février 2024	Yes	Yes	30	Male	Schizophrenia	Substance use disorder (in remission)	Paranoia, auditory hallucinations, delusions, disorganized thinking, refusal of medication, aggressive verbal behavior	Yes (in remission)	Cannabis, alcohol	Treatment and housing	Risperdal injection, structured housing, follow-up with community team	Urine tests, lab monitoring, psychiatric evaluations	2	Accepted	Entirely	2
28 février 2024	Yes	Yes	45	Female	Bipolar disorder	Anxiety disorder	Elevated mood, pressured speech, distractibility, insomnia, impulsive behavior, irritability, inability to maintain employment	Yes	Cannabis, alcohol	Treatment order	Abilify injection, psychotherapy, support group referral	Blood testing, urine drug screen, mental health assessments	1	Accepted	Entirely	1
27 février 2024	Yes	Yes	56	Male	Schizophrenia	Hypertension	Delusional beliefs, neglect of health needs, avoidance of psychiatric services, difficulty communicating, social withdrawal	No		Treatment order	Antipsychotic injections (Invega), follow-up with case worker, community support	Blood work, physical evaluations, psychiatric consultations	2	Accepted	Entirely	2
26 février 2024	Yes	Yes	38	Female	Schizoaffective disorder	Obsessive-compulsive traits	Paranoia, disorganized speech, obsessive thoughts, delusions, impaired functioning, refusal to comply with care plan	Yes	Cannabis	Treatment and housing	Invega Trinza, therapeutic support, structured residential environment	Lab work, urine tests, psychiatric supervision	3	Accepted	Entirely	3
25 février 2024	Yes	Not specified	62	Male	Delusional disorder	None listed	Persistent persecutory delusions, fixation on legal issues, refusal of psychiatric care, accusations of conspiracies, lack of insight	No	N/A	Treatment order	Risperidone, psychiatric monitoring, medication compliance support	Regular psychiatric reviews, medication adjustment authority	1	Accepted	Entirely	1
23 février 2024	Yes	Yes	40	Female	Schizophrenia	Anxiety disorder	Disorganized thinking, fear of being harmed, auditory hallucinations, emotional outbursts, noncompliance with care plan	Yes	Cannabis	Treatment order	Antipsychotic injection (Invega), follow-up with SIM team	Urine screens, psychiatric evaluation, vital monitoring	2	Accepted	Partially	1
22 février 2024	Yes	Yes	58	Male	Schizoaffective disorder	Possible substance use disorder	Disorganized behavior, paranoia, aggressive language, emotional dysregulation, avoidance of care, multiple hospitalizations	Yes	Cannabis, alcohol (unconfirmed)	Treatment order	Invega Sustenna, psychosocial support team, psychiatric supervision	Urine testing, blood panels, community nurse visits	3	Accepted	Entirely	3
21 février 2024	Yes	Yes	27	Female	Bipolar disorder	None specified	Delusions of grandeur, irritability, mood instability, pressured speech, flight of ideas, denial of illness	Yes	Cannabis, alcohol	Treatment and housing	Abilify injection, psychotherapy, psychosocial monitoring	Mood questionnaires, urine screening, therapy follow-up	2	Accepted	Partially	1
20 février 2024	Yes	Not specified	49	Male	Paranoid schizophrenia	None	Suspicion of being followed, hostility toward treatment providers, poor adherence, delusional system fixed on neighbor surveillance	No	N/A	Treatment order	Risperdal Consta, psychiatric monitoring, medication adherence support	ECGs, psychiatric review, possible lab tests	2	Accepted	Entirely	2
19 février 2024	Yes	Yes	52	Female	Schizophrenia	None listed	Paranoia, delusional thoughts, auditory hallucinations, avoidance of care, episodes of violence, poor interpersonal functioning	Yes	Alcohol, cannabis	Treatment and housing	Antipsychotic injection (Invega), supportive housing, psychosocial services	Toxicology reports, psychiatric assessments, housing placement	3	Accepted	Entirely	3
25 avril 2024	Yes	Yes	54	Male	Schizoaffective disorder	Hypertension	Auditory hallucinations, delusional thoughts, mood instability, refusal of medication, poor social functioning	No		Treatment and housing	Invega Trinza, psychosocial team support, supervised housing, crisis plan	Blood tests, ECG, psychiatric monitoring	3	Accepted	Entirely	3
22 avril 2024	Yes	Yes	36	Female	Paranoid schizophrenia	None specified	Paranoia, delusions of persecution, poor insight, disorganized thinking, refusal to collaborate with medical teams	Yes	Cannabis	Treatment order	Risperdal Consta, community nurse, outpatient psychiatry	Urine drug screens, blood testing, medical follow-ups	2	Accepted	Partially	1
19 avril 2024	Yes	Not specified	61	Male	Schizophrenia	Diabetes	Social withdrawal, persecutory delusions, difficulty with medication adherence, verbal outbursts, mistrust of providers	Yes	Cannabis, alcohol	Treatment and housing	Invega Sustenna, case management, home visit support, residential assistance	Blood pressure checks, urine screening, glucose monitoring	2	Accepted	Entirely	2
17 avril 2024	Yes	Yes	45	Female	Bipolar I disorder	Substance use disorder (in remission)	Elevated mood, insomnia, excessive spending, risky behavior, pressured speech, hallucinations during decompensation	Yes (in remission)	Cannabis, cocaine (past)	Treatment order	Abilify Maintena, mood stabilizer (Lithium), blood level checks, outpatient monitoring	Lithium levels, blood panels, psychiatric supervision	3	Accepted	Entirely	3
15 avril 2024	Yes	Yes	33	Male	Schizophrenia	Substance use disorder	Hallucinations, delusions, noncompliance with treatment, verbal aggression, social isolation, mistrust of care providers	Yes	Cannabis, alcohol	Treatment and housing	Invega Sustenna, follow-up with SIM team, structured housing, medical monitoring	Urine toxicology, lab work, psychiatric assessment	2	Accepted	Entirely	2
12 avril 2024	Yes	Not specified	59	Female	Paranoid schizophrenia	Hypertension	Fixed delusions, verbal aggression, poor medication adherence, history of hospitalizations	No		Treatment order	Risperdal Consta, community follow-up, blood pressure monitoring	Blood work, psychiatric check-ins, ECG	3	Accepted	Partially	1
10 avril 2024	Yes	Yes	28	Male	Bipolar I disorder with psychotic features	Cannabis use disorder	Grandiose delusions, pressured speech, racing thoughts, emotional instability, agitation during decompensations, lack of insight	Yes	Cannabis	Treatment order	Abilify Maintena, mood stabilizers, outpatient care	Mood tracking, urine testing, blood draws	2	Accepted	Entirely	2
8 avril 2024	Yes	Yes	48	Female	Schizoaffective disorder	Diabetes	Hallucinations, disorganized behavior, poor hygiene, refusal of treatment, social withdrawal, impaired daily functioning	Yes	Cannabis, alcohol	Treatment and housing	Invega Trinza, case management, medical and psychiatric support	Blood glucose tests, urine screening, psychiatric assessments	2	Accepted	Entirely	2
5 avril 2024	Yes	Yes	39	Male	Schizophrenia	Substance use disorder	Disorganized speech, visual hallucinations, suspiciousness, lack of insight, noncompliance with medication	Yes	Cannabis, alcohol	Treatment and housing	Invega Sustenna, housing supervision, follow-up by SIM team	Urine toxicology, psychiatric check-ins, labs	2	Accepted	Entirely	2
3 avril 2024	Yes	Yes	43	Female	Bipolar I disorder	Anxiety disorder	Irritability, elevated mood, decreased need for sleep, intrusive behavior, hallucinations, lack of judgment	Yes	Cannabis	Treatment and housing	Abilify Maintena, mood stabilizers, supervised residence	Mood assessments, urine toxicology, medication compliance check	3	Accepted	Partially	2
2 avril 2024	Yes	Not specified	37	Male	Paranoid schizophrenia	None listed	Persecutory delusions, history of violence, medication refusal, suspiciousness, withdrawal from social contact	Yes	Cannabis	Treatment order	Risperdal injection, community psychiatric care	Urine drug screens, psychiatric follow-ups, routine blood work	2	Accepted	Entirely	2
1 avril 2024	Yes	Yes	50	Female	Schizoaffective disorder	Diabetes, PTSD	Auditory hallucinations, nightmares, flashbacks, paranoia, medication nonadherence	No	N/A	Treatment and housing	Invega Trinza, trauma therapy, housing with medical supervision	Blood glucose monitoring, psychiatric assessments	3	Accepted	Entirely	3
1 avril 2024	Yes	Yes	60	Male	Delusional disorder	None listed	Persistent fixed false beliefs, litigation delusions, hostility toward treatment team, lack of insight into condition	No	N/A	Treatment order	Risperidone oral or injectable, continued psychiatric follow-up	Blood tests, regular psychiatric assessments	1	Accepted	Entirely	1
31 mai 2024	Yes	Yes	34	Male	Schizophrenia	Cannabis use disorder	Auditory hallucinations, disorganized thoughts, suspiciousness, verbal aggression, refusal of medication, repeated hospitalizations	Yes	Cannabis, alcohol	Treatment order	Invega Sustenna, psychiatric monitoring, SIM team follow-up	Urine screening, blood tests, psychiatric evaluation	2	Accepted	Entirely	2
30 mai 2024	Yes	Not specified	40	Female	Paranoid schizophrenia	Hypertension	Delusions of persecution, refusal of care, non-adherence to medication, social withdrawal, mistrust toward caregivers	No		Treatment order	Risperdal Consta, outpatient psychiatric care, home visits	Blood work, psychiatric monitoring	1	Accepted	Entirely	1
29 mai 2024	Yes	Yes	47	Male	Bipolar I disorder with psychotic features	Substance use disorder	Manic symptoms, grandiose delusions, poor insight, impulsive behaviors, history of decompensation and medication non-adherence	Yes	Cannabis, cocaine, alcohol	Treatment and housing	Abilify Maintena, Lithium, community supervision, psychosocial support	Lithium blood levels, urine toxicology, psychiatric assessments	3	Accepted	Partially	2
27 mai 2024	Yes	Yes	38	Female	Schizoaffective disorder	None specified	Hallucinations, persecutory delusions, impulsivity, aggression during crisis episodes, lack of treatment compliance	Yes	Alcohol, cannabis	Treatment and housing	Invega Trinza, case worker involvement, housing with supervision	Blood and urine tests, psychiatric follow-up	3	Accepted	Entirely	3
24 mai 2024	Yes	Yes	29	Male	Bipolar I disorder	Cannabis use disorder	Mood instability, impulsivity, delusional thinking, social dysfunction, repeated decompensations following substance use	Yes	Cannabis	Treatment order	Abilify injection, mood stabilizer, outpatient services	Urine drug screens, psychiatric monitoring, medical exams	2	Accepted	Entirely	2
23 mai 2024	Yes	Yes	52	Female	Schizoaffective disorder	None reported	Auditory hallucinations, paranoid delusions, disorganized thoughts, verbal outbursts, history of hospitalizations, refusal of treatment	No		Treatment and housing	Invega Sustenna, community nursing, structured housing	Psychiatric evaluations, lab tests	3	Accepted	Entirely	3
22 mai 2024	Yes	Not specified	60	Male	Paranoid schizophrenia	Substance use disorder	Paranoid delusions, hostility, poor insight, aggression, refusal of all care, multiple relapses, suspicious behavior	Yes	Cannabis, alcohol	Treatment order	Risperdal Consta, psychiatric support, community safety planning	Urine toxicology, psychiatric monitoring	2	Accepted	Partially	1
21 mai 2024	Yes	Yes	31	Female	Bipolar disorder	Cannabis use disorder	Manic episodes, grandiose thoughts, agitation, emotional lability, insomnia, impaired judgment, social disruption	Yes	Cannabis	Treatment order	Abilify Maintena, mood stabilizers, outpatient follow-up	Blood monitoring, urine screening, psychiatric evaluation	2	Accepted	Entirely	2
17 mai 2024	Yes	Yes	43	Male	Schizophrenia	PTSD	Auditory hallucinations, delusions of reference, fear of being watched, emotional blunting, neglect of personal hygiene	No		Treatment and housing	Invega Trinza, home care nurse, case management	Urine tests, psychiatric review, lab monitoring	3	Accepted	Entirely	3
15 mai 2024	Yes	Not specified	36	Female	Schizoaffective disorder	None reported	Disorganized thoughts, auditory hallucinations, paranoid ideation, impulsivity, poor insight, repeated relapses	Yes	Cannabis, alcohol	Treatment and housing	Abilify injection, supportive housing, clinical case monitoring	Toxicology screens, psychiatric assessments	2	Accepted	Entirely	2
14 mai 2024	Yes	Yes	49	Male	Schizophrenia	None listed	Delusional thinking, suspiciousness, social withdrawal, lack of insight, refusal of care, aggressive behavior when untreated	No		Treatment and housing	Invega Sustenna, community supervision, psychiatric assessments	Urine screening, psychiatric follow-up, ECG	3	Accepted	Partially	2
13 mai 2024	Yes	Yes	58	Female	Schizoaffective disorder	None listed	Auditory hallucinations, fear of poisoning, erratic behavior, refusal of medication, poor hygiene	Yes	Cannabis	Treatment order	Abilify Maintena, psychiatric support, home care visits	Urine testing, medical exams, psychiatric evaluation	2	Accepted	Entirely	2
10 mai 2024	Yes	Not specified	26	Male	Bipolar disorder with psychotic features	Substance use disorder	Mania, insomnia, delusions, impulsive spending, disinhibition, non-adherence to medication, social disturbances	Yes	Cannabis, alcohol	Treatment and housing	Abilify Maintena, mood stabilizer, housing supervision	Urine toxicology, psychiatric support, blood tests	3	Accepted	Partially	2
8 mai 2024	Yes	Yes	63	Male	Paranoid schizophrenia	None listed	Persecutory delusions, disorganized behavior, history of refusal to engage in care, verbal aggression, isolation	No		Treatment order	Invega Sustenna, psychiatric follow-up, peace officer support if needed	Lab work, psychiatric assessments	1	Accepted	Entirely	1
6 mai 2024	Yes	Not specified	42	Female	Schizophrenia	PTSD	Hallucinations, emotional dysregulation, paranoia, insomnia, refusal of medication, fear of persecution	Yes	Cannabis	Treatment and housing	Abilify Maintena, trauma-informed care, social services	Urine toxicology, psychiatric assessments, trauma therapy	2	Accepted	Entirely	2
3 mai 2024	Yes	Yes	57	Female	Paranoid schizophrenia	None specified	Paranoia, social withdrawal, distrust, fixed false beliefs, history of non-adherence, episodes of verbal aggression	No	N/A	Treatment order	Risperdal injection, psychiatric follow-up, case management	Blood tests, psychiatric evaluations	1	Accepted	Entirely	1
2 mai 2024	Yes	Not specified	44	Male	Schizophrenia	Substance use disorder	Auditory hallucinations, disorganized thoughts, delusions, poor hygiene, history of aggression, multiple hospitalizations	Yes	Alcohol, cannabis	Treatment and housing	Invega Sustenna, SIM team involvement, housing support	Urine toxicology, psychiatric evaluations	3	Accepted	Partially	2
1 mai 2024	Yes	Yes	41	Female	Bipolar disorder	None listed	Manic and depressive episodes, disorganized thinking, agitation, refusal to adhere to care plan, social dysfunction	Yes	Cannabis	Treatment order	Abilify injection, follow-up psychiatry, medication management	Mood tracking, lab testing, psychiatric appointments	2	Accepted	Entirely	2
1 mai 2024	Yes	Yes	32	Male	Schizophrenia	Autism spectrum disorder	Delusions of reference, hallucinations, rigid thinking, severe social impairment, lack of insight, difficulty functioning independently	No	N/A	Treatment and housing	Invega Trinza, psychosocial support, supervised living environment	Psychiatric supervision, urine drug screens, routine monitoring	3	Accepted	Entirely	3
28 juin 2024	Yes	Yes	55	Female	Schizoaffective disorder	None listed	Delusional thoughts, poor hygiene, disorganized behavior, history of aggression, refusal to collaborate with psychiatric team	Yes	Cannabis, alcohol	Treatment and housing	Invega Trinza, community nurse supervision, psychiatric monitoring	Urine toxicology, psychiatric assessments	2	Accepted	Entirely	2
26 juin 2024	Yes	Not specified	39	Male	Schizophrenia	Substance use disorder	Paranoia, auditory hallucinations, verbal threats, medication non-adherence, isolation, aggression toward staff	Yes	Cannabis	Treatment order	Abilify Maintena, psychiatric nurse follow-up, social support	Urine drug screening, psychiatric evaluations	3	Accepted	Partially	2
24 juin 2024	Yes	Yes	28	Female	Bipolar disorder with psychotic features	Anxiety disorder	Manic symptoms, rapid speech, insomnia, delusional thinking, past involuntary hospitalizations	Yes	Cannabis	Treatment and housing	Abilify injection, mood stabilizers, psychosocial team involvement	Blood levels, psychiatric follow-ups	2	Accepted	Entirely	2
21 juin 2024	Yes	Yes	63	Male	Paranoid schizophrenia	None listed	Delusions of persecution, refusal to take medication, history of violence, lack of insight, socially disruptive behavior	No	N/A	Treatment order	Invega Sustenna, peace officer escort if needed, psychiatric case management	Urine drug testing, medical supervision	1	Accepted	Entirely	1
20 juin 2024	Yes	Not specified	47	Female	Schizoaffective disorder	PTSD	Auditory hallucinations, delusions, depressive symptoms, emotional instability, non-adherence to treatment	Yes	Cannabis, alcohol	Treatment and housing	Risperdal Consta, trauma-informed therapy, structured housing	Urine testing, psychiatric follow-up, lab monitoring	2	Accepted	Entirely	2
18 juin 2024	Yes	Yes	35	Male	Bipolar disorder	None listed	Mania, impulsivity, irritability, grandiosity, substance use linked to relapses	Yes	Cannabis, alcohol	Treatment order	Abilify injection, psychiatric care, relapse prevention planning	Toxicology reports, blood screening	2	Accepted	Partially	1
17 juin 2024	Yes	Yes	59	Female	Schizoaffective disorder	None listed	Hallucinations, fixed false beliefs, unstable affect, chronic symptoms, frequent ER visits, poor social functioning	No	N/A	Treatment and housing	Invega Trinza, nursing supervision, structured follow-up	Urine and blood tests, psychiatric check-ins	2	Accepted	Entirely	2
14 juin 2024	Yes	Not specified	62	Male	Paranoid schizophrenia	Cognitive decline	Delusions, paranoia, memory issues, disorientation, refusal to accept help, multiple psychiatric admissions	No	N/A	Treatment and housing	Risperdal Consta, cognitive evaluations, housing supervision	Cognitive testing, psychiatric monitoring	3	Accepted	Partially	2
12 juin 2024	Yes	Yes	46	Female	Schizoaffective disorder	None listed	Auditory hallucinations, non-adherence to care, emotional volatility, frequent crises	Yes	Cannabis	Treatment and housing	Abilify Maintena, community support, housing intervention	Urine drug testing, psychiatric evaluations	2	Accepted	Entirely	2
10 juin 2024	Yes	Yes	29	Male	Bipolar disorder	None	Mania, pressured speech, insomnia, disorganized behavior, refusal of medication	Yes	Cannabis, alcohol	Treatment and housing	Abilify injection, mood stabilization, housing with supervision	Urine screens, psychiatric assessments, regular follow-up	3	Accepted	Entirely	3
30 juillet 2024	Yes	Yes	36	Male	Schizoaffective disorder	Cannabis use disorder	Auditory hallucinations, delusions, refusal to collaborate, poor hygiene, history of non-compliance with care	Yes	Cannabis	Treatment and housing	Invega Trinza, psychosocial support, follow-up by SIM team	Blood work, urine screening, psychiatric evaluation	2	Accepted	Entirely	2
29 juillet 2024	Yes	Yes	44	Female	Schizophrenia	None	Paranoia, hallucinations, verbal aggression, poor insight, social withdrawal	Yes	Cannabis, alcohol	Treatment order	Risperdal Consta, psychiatric monitoring, housing coordination	Urine screening, psychiatric evaluations	2	Accepted	Partially	1
26 juillet 2024	Yes	Yes	51	Male	Paranoid schizophrenia	Hypertension	Delusions of surveillance, verbal outbursts, disorganized behavior, history of hospitalization, medication refusal	No		Treatment order	Invega Sustenna, psychiatric nurse follow-up	Blood pressure monitoring, psychiatric assessments	2	Accepted	Entirely	2
24 juillet 2024	Yes	Not specified	33	Female	Schizoaffective disorder	None	Mood swings, hallucinations, paranoia, impaired functioning, non-adherence to medication and therapy	Yes	Cannabis	Treatment and housing	Abilify Maintena, community services, housing with supervision	Urine toxicology, follow-up assessments	3	Accepted	Entirely	3
22 juillet 2024	Yes	Yes	29	Male	Bipolar I disorder	Cannabis use disorder	Manic episode, grandiosity, pressured speech, spending sprees, poor judgment, refusal to take medication	Yes	Cannabis	Treatment order	Abilify injection, mood stabilizer, community psychiatric follow-up	Mood tracking, urine toxicology, psychiatric check-ins	2	Accepted	Entirely	2
19 juillet 2024	Yes	Yes	41	Female	Schizoaffective disorder	PTSD	Auditory hallucinations, emotional instability, anxiety, disorganized behavior, history of psychiatric relapses	Yes	Cannabis, alcohol	Treatment and housing	Abilify Maintena, trauma therapy, supervised residence	Urine screening, psychiatric follow-up, lab tests	2	Accepted	Entirely	2
17 juillet 2024	Yes	Yes	53	Male	Schizophrenia	Cognitive impairment	Fixed delusions, poor hygiene, memory loss, difficulty following treatment, hostile behavior toward care providers	No		Treatment order	Risperdal Consta, home nurse monitoring, cognitive evaluations	Blood work, psychiatric exams	1	Accepted	Entirely	1
15 juillet 2024	Yes	Yes	47	Female	Bipolar disorder	Anxiety disorder	Irritability, mood instability, racing thoughts, disinhibition, insomnia	Yes	Cannabis	Treatment and housing	Abilify injection, therapy, psychiatric monitoring	Urine screening, blood testing, psychotherapy monitoring	2	Accepted	Entirely	2
12 juillet 2024	Yes	Yes	61	Male	Paranoid schizophrenia	None	Persecutory delusions, resistance to care, aggression during crisis, non-adherence to medication	No		Treatment order	Invega Trinza, psychiatric oversight, peace officer escort if needed	Blood tests, psychiatric follow-up	1	Accepted	Entirely	1
10 juillet 2024	Yes	Not specified	38	Female	Schizoaffective disorder	Substance use disorder	Auditory hallucinations, impaired judgment, paranoia, frequent relapses, substance use complicating recovery	Yes	Cannabis, alcohol	Treatment and housing	Abilify Maintena, SIM team support, addiction services	Urine drug testing, psychiatric reviews, medical assessments	3	Accepted	Entirely	3
8 juillet 2024	Yes	Yes	31	Male	Bipolar disorder with psychotic features	Cannabis use disorder	Elevated mood, hallucinations, insomnia, impulsive spending, history of psychiatric admissions	Yes	Cannabis	Treatment order	Abilify injection, psychiatric follow-up, substance use monitoring	Urine toxicology, mood tracking, psychiatric assessments	2	Accepted	Entirely	2
30 août 2024	Yes	Yes	32	Male	Schizophrenia	Substance use disorder	Auditory hallucinations, paranoia, noncompliance with treatment, agitation, past hospitalizations	Yes	Cannabis, alcohol	Treatment and housing	Invega Trinza, supervised housing, psychiatric follow-up	Urine toxicology, psychiatric evaluation	2	Accepted	Entirely	2
28 août 2024	Yes	Not specified	40	Female	Bipolar disorder with psychotic features	Cannabis use disorder	Mood elevation, grandiosity, pressured speech, refusal of care, past relapses	Yes	Cannabis	Treatment order	Abilify injection, outpatient monitoring, relapse prevention	Urine drug screens, psychiatric evaluation	3	Accepted	Partially	2
26 août 2024	Yes	Yes	47	Male	Schizoaffective disorder	PTSD	Auditory hallucinations, emotional lability, nightmares, history of violence	Yes	Cannabis, alcohol	Treatment and housing	Risperdal Consta, trauma-informed therapy, supported housing	Urine screening, blood tests, psychiatric assessments	2	Accepted	Entirely	2
23 août 2024	Yes	Yes	51	Female	Schizophrenia	Hypertension	Delusional thinking, resistance to treatment, disorganized behavior, history of neglect	No		Treatment order	Invega Sustenna, medical support, housing assistance	Blood pressure monitoring, psychiatric evaluations	1	Accepted	Entirely	1
21 août 2024	Yes	Yes	28	Male	Bipolar I disorder	None	Manic behavior, insomnia, irritability, impulsivity, recent hospitalization	Yes	Cannabis, alcohol	Treatment and housing	Abilify injection, follow-up care, housing support	Urine screening, psychiatric monitoring	2	Accepted	Entirely	2
19 août 2024	Yes	Yes	36	Female	Schizoaffective disorder	None	Hallucinations, delusions, poor hygiene, refusal of medication, history of psychosis	Yes	Cannabis	Treatment and housing	Risperdal Consta, community housing, psychiatric follow-up	Urine testing, lab work	2	Accepted	Entirely	2
16 août 2024	Yes	Not specified	54	Male	Paranoid schizophrenia	Diabetes	Paranoia, verbal aggression, disorganized behavior, non-compliance with treatment and diet	No		Treatment order	Invega Sustenna, home visits, diabetic monitoring	Blood sugar checks, psychiatric evaluations	1	Accepted	Entirely	1
14 août 2024	Yes	Yes	30	Male	Bipolar disorder	Substance use disorder	Manic episodes, risky behavior, insomnia, impulsivity, recent hospitalization	Yes	Cannabis, alcohol, cocaine	Treatment and housing	Abilify injection, addiction services, psychiatric oversight	Urine toxicology, follow-up labs	2	Accepted	Partially	1
12 août 2024	Yes	Yes	41	Female	Schizophrenia	PTSD	Hallucinations, anxiety, isolation, aggression, difficulty maintaining treatment adherence	Yes	Cannabis	Treatment order	Risperdal Consta, trauma therapy, housing support	Urine drug screening, psychiatric check-ins	3	Accepted	Partially	2
9 août 2024	Yes	Yes	37	Male	Schizoaffective disorder	Cannabis use disorder	Mood swings, hallucinations, delusional thoughts, substance relapse, non-compliance with care	Yes	Cannabis, alcohol	Treatment and housing	Abilify Maintena, psychosocial support, addiction follow-up	Urine drug tests, psychiatric evaluation	2	Accepted	Entirely	2
7 août 2024	Yes	Yes	49	Female	Schizoaffective disorder	None	Paranoia, disorganized speech, emotional instability, history of hospitalizations, poor insight	No	N/A	Treatment and housing	Abilify Maintena, supervised residence, follow-up by psychiatric nurse	Psychiatric assessments, medication monitoring	2	Accepted	Entirely	2
30 septembre 2024	Yes	Yes	37	Male	Schizophrenia	Cannabis use disorder	Auditory hallucinations, delusions of persecution, aggressive behavior, refusal of treatment, poor judgment	Yes	Cannabis	Treatment and housing	Invega Trinza, supervised residence, psychiatric follow-up	Urine toxicology, psychiatric monitoring	2	Accepted	Entirely	2
27 septembre 2024	Yes	Yes	42	Female	Bipolar disorder with psychotic features	Anxiety disorder	Mood swings, hallucinations, irritability, refusal of care, repeated psychiatric admissions	Yes	Cannabis, alcohol	Treatment and housing	Abilify injection, mood stabilizers, therapy, housing support	Urine and blood tests, psychiatric assessments	3	Accepted	Partially	2
25 septembre 2024	Yes	Not specified	50	Male	Paranoid schizophrenia	Hypertension	Persecutory delusions, refusal of medication, verbal aggression, history of violence	No		Treatment order	Risperdal Consta, community psychiatric care	Blood pressure checks, psychiatric evaluations	1	Accepted	Entirely	1
23 septembre 2024	Yes	Yes	29	Female	Schizoaffective disorder	PTSD	Auditory hallucinations, emotional dysregulation, trauma symptoms, resistance to care, repeated relapses	Yes	Cannabis, alcohol	Treatment and housing	Abilify Maintena, trauma therapy, supervised housing	Urine testing, psychiatric check-ins	3	Accepted	Entirely	3
20 septembre 2024	Yes	Yes	34	Male	Bipolar disorder	None	Insomnia, impulsivity, pressured speech, disorganized thoughts, substance use relapse	Yes	Cannabis	Treatment order	Abilify injection, outpatient psychiatry, relapse prevention planning	Mood tracking, drug screens, psychiatric monitoring	2	Accepted	Entirely	2
18 septembre 2024	Yes	Not specified	58	Male	Paranoid schizophrenia	Hypertension	Delusions of being followed, verbal hostility, medication non-adherence, multiple hospitalizations	No		Treatment order	Risperdal injection, follow-up with outpatient psychiatry, medical supervision	Psychiatric reviews, blood pressure monitoring	2	Accepted	Entirely	2
16 septembre 2024	Yes	Yes	39	Female	Schizoaffective disorder	None listed	Auditory hallucinations, paranoia, mood swings, denial of illness, non-adherence to care plan	Yes	Cannabis, alcohol	Treatment and housing	Abilify Maintena, supportive housing, psychiatric case management	Urine screening, psychiatric evaluations	3	Accepted	Partially	2
13 septembre 2024	Yes	Yes	45	Male	Bipolar disorder with psychotic features	None listed	Grandiosity, irritability, disinhibition, impulsivity, financial instability	Yes	Cannabis	Treatment order	Abilify injection, mood stabilizers, outpatient psychiatric care	Mood tracking, toxicology reports, psychiatric follow-up	2	Accepted	Entirely	2
11 septembre 2024	Yes	Yes	31	Female	Schizophrenia	Autism spectrum disorder	Delusional thoughts, anxiety, rigid routines, social withdrawal, impaired functioning	No		Treatment and housing	Invega Sustenna, autism-informed psychiatric care, housing support	Psychiatric assessments, medical monitoring	3	Accepted	Entirely	3
9 septembre 2024	Yes	Yes	26	Male	Bipolar I disorder	Substance use disorder	Insomnia, pressured speech, grandiosity, hallucinations, frequent relapses, refusal of treatment	Yes	Cannabis, alcohol	Treatment and housing	Abilify Maintena, addiction counseling, supportive housing	Urine drug tests, psychiatric assessments	2	Accepted	Partially	1
6 septembre 2024	Yes	Yes	48	Female	Schizoaffective disorder	Hypertension	Auditory hallucinations, mood instability, delusions of reference, poor medication adherence, previous hospitalizations	No	N/A	Treatment order	Abilify Maintena, mood stabilizer, psychiatric nurse visits	Psychiatric assessments, blood pressure checks	2	Accepted	Entirely	2
4 septembre 2024	Yes	Not specified	30	Male	Bipolar disorder	Cannabis use disorder	Elevated mood, pressured speech, grandiosity, non-compliance with care plan, social dysfunction	Yes	Cannabis	Treatment and housing	Abilify injection, outpatient follow-up, SIM team monitoring	Urine drug testing, psychiatric supervision	3	Accepted	Partially	2
31 octobre 2024	Yes	Yes	35	Female	Schizoaffective disorder	Cannabis use disorder	Auditory hallucinations, paranoid delusions, noncompliance with treatment, irritability, impulsivity	Yes	Cannabis, alcohol	Treatment and housing	Abilify Maintena, psychosocial services, supervised housing	Urine drug screening, psychiatric evaluations	2	Accepted	Entirely	2
29 octobre 2024	Yes	Not specified	59	Male	Paranoid schizophrenia	Hypertension	Persecutory delusions, history of aggression, non-adherence to medication, verbal threats, repeated hospitalizations	No		Treatment order	Invega Sustenna, community monitoring, medical supervision	Psychiatric evaluations, vital sign monitoring	1	Accepted	Entirely	1
28 octobre 2024	Yes	Yes	27	Female	Bipolar disorder with psychotic features	Substance use disorder	Elevated mood, pressured speech, delusions, grandiosity, spending sprees, irritability, sleep disturbance	Yes	Cannabis, alcohol	Treatment order	Abilify injection, outpatient psychiatric follow-up	Urine screening, mood tracking	3	Accepted	Partially	2
25 octobre 2024	Yes	Yes	46	Male	Schizophrenia	None	Auditory hallucinations, disorganized behavior, neglect of hygiene, resistance to treatment	No		Treatment and housing	Risperdal Consta, psychiatric supervision, structured housing	Lab testing, psychiatric review	2	Accepted	Entirely	2
23 octobre 2024	Yes	Yes	32	Female	Schizoaffective disorder	PTSD	Emotional dysregulation, hallucinations, past trauma, impulsivity, insomnia	Yes	Cannabis	Treatment and housing	Invega Trinza, trauma-informed therapy, caseworker support	Urine toxicology, psychiatric assessments	3	Accepted	Entirely	3
21 octobre 2024	Yes	Yes	43	Male	Paranoid schizophrenia	Diabetes	Delusional beliefs, suspiciousness, isolation, noncompliance with medication and diet	No		Treatment and housing	Invega Sustenna, diabetes care, structured housing	Blood glucose testing, psychiatric review	3	Accepted	Entirely	3
18 octobre 2024	Yes	Yes	36	Female	Bipolar I disorder	Substance use disorder	Insomnia, impulsive decisions, hallucinations, elevated mood, irritability, poor insight	Yes	Cannabis, alcohol	Treatment order	Abilify Maintena, psychiatric support, relapse prevention	Urine drug testing, psychiatric assessments	2	Accepted	Partially	1
16 octobre 2024	Yes	Not specified	48	Male	Schizophrenia	None	Auditory hallucinations, delusions of control, medication refusal, aggression during episodes	No		Treatment and housing	Risperdal Consta, psychiatric monitoring, housing stability services	Lab monitoring, psychiatric follow-up	3	Accepted	Entirely	3
14 octobre 2024	Yes	Yes	29	Female	Bipolar disorder	None listed	Grandiosity, decreased need for sleep, excessive talking, euphoria, poor judgment	Yes	Cannabis	Treatment order	Abilify injection, case manager involvement, follow-up by SIM team	Urine drug testing, mood assessments	2	Accepted	Entirely	2
11 octobre 2024	Yes	Yes	55	Male	Schizoaffective disorder	None	Hallucinations, social withdrawal, emotional blunting, repeated decompensation	No		Treatment and housing	Invega Trinza, housing with supervision, psychiatric follow-up	Psychiatric evaluations, lab testing	2	Accepted	Entirely	2
9 octobre 2024	Yes	Not specified	40	Female	Schizoaffective disorder	Substance use disorder	Hallucinations, paranoia, disorganized thoughts, poor insight, substance-induced relapse	Yes	Cannabis, cocaine, alcohol	Treatment and housing	Risperdal Consta, psychosocial follow-up, housing assistance	Urine drug screening, psychiatric evaluations	3	Accepted	Partially	2
7 octobre 2024	Yes	Yes	28	Male	Bipolar disorder with psychotic features	Cannabis use disorder	Delusions, manic behavior, impulsivity, medication non-adherence, history of hospitalization	Yes	Cannabis	Treatment order	Abilify injection, outpatient psychiatric support	Toxicology tests, psychiatric follow-up	2	Accepted	Entirely	2
29 novembre 2024	Yes	Yes	52	Male	Schizoaffective disorder	Substance use disorder	Auditory hallucinations, delusional beliefs, verbal aggression, disorganized thinking	Yes	Cannabis, alcohol, cocaine	Treatment and housing	Invega Trinza, supervised housing, addiction services, psychiatric support	Urine screening, psychiatric monitoring	2	Accepted	Entirely	2
27 novembre 2024	Yes	Not specified	38	Female	Bipolar disorder with psychotic features	PTSD	Mania, delusions, emotional lability, refusal of medication, impaired insight	Yes	Cannabis	Treatment order	Abilify injection, trauma-informed care, psychiatric supervision	Urine toxicology, psychiatric assessments	1	Accepted	Entirely	1
25 novembre 2024	Yes	Yes	44	Male	Paranoid schizophrenia	Hypertension	Delusions of persecution, refusal to collaborate with psychiatric team, history of violence	No		Treatment and housing	Risperdal Consta, community housing, medical monitoring	Blood pressure checks, psychiatric evaluations	3	Accepted	Partially	2
22 novembre 2024	Yes	Yes	31	Female	Schizoaffective disorder	Substance use disorder	Auditory hallucinations, delusions of grandeur, poor hygiene, substance relapse	Yes	Cannabis, alcohol	Treatment and housing	Abilify Maintena, addiction follow-up, supported living	Urine screening, psychiatric reviews	2	Accepted	Entirely	2
20 novembre 2024	Yes	Yes	29	Male	Bipolar I disorder	None listed	Impulsivity, insomnia, racing thoughts, grandiosity, medication non-adherence	Yes	Cannabis	Treatment order	Abilify injection, psychiatric follow-up, caseworker monitoring	Mood tracking, urine testing, psychiatric evaluations	2	Accepted	Entirely	2
18 novembre 2024	Yes	Yes	41	Female	Paranoid schizophrenia	None	Paranoia, delusions of reference, refusal of care, poor functioning, hostility	No		Treatment order	Invega Sustenna, psychiatric follow-up, housing liaison	Lab work, psychiatric evaluations	2	Accepted	Entirely	2
15 novembre 2024	Yes	Not specified	36	Male	Schizoaffective disorder	Cannabis use disorder	Hallucinations, erratic behavior, difficulty maintaining hygiene, history of hospitalizations	Yes	Cannabis	Treatment and housing	Abilify injection, housing with support, substance use intervention	Urine screening, psychiatric reviews	1	Accepted	Entirely	1
13 novembre 2024	Yes	Yes	30	Female	Bipolar disorder	PTSD	Mood lability, trauma symptoms, racing thoughts, emotional dysregulation, self-neglect	Yes	Cannabis, alcohol	Treatment and housing	Abilify injection, trauma therapy, supervised housing	Urine testing, psychiatric monitoring	3	Accepted	Partially	2
11 novembre 2024	Yes	Yes	60	Male	Paranoid schizophrenia	Cognitive decline	Suspiciousness, impaired memory, wandering, verbal threats, delusional beliefs	No		Treatment order	Risperdal Consta, neurocognitive assessments, medical oversight	Cognitive testing, blood work	2	Accepted	Entirely	2
8 novembre 2024	Yes	Yes	33	Male	Schizoaffective disorder	Cannabis use disorder	Auditory hallucinations, social withdrawal, impulsivity, delusional thinking, frequent relapses	Yes	Cannabis	Treatment order	Abilify injection, addiction counseling, psychiatric supervision	Urine drug screening, psychiatric evaluations	1	Accepted	Entirely	1
6 novembre 2024	Yes	Not specified	47	Female	Bipolar disorder	None	Mania, pressured speech, insomnia, impulsivity, refusal of treatment, disrupted relationships	Yes	Cannabis, alcohol	Treatment and housing	Abilify Maintena, psychiatric follow-up, psychosocial team support	Urine toxicology, psychiatric evaluations	2	Accepted	Entirely	2
4 novembre 2024	Yes	Yes	62	Male	Schizophrenia	Cognitive decline	Disorientation, paranoia, wandering, neglect of personal care, frequent psychiatric relapses	No	N/A	Treatment and housing	Risperdal Consta, structured housing, neurocognitive evaluation	Cognitive testing, psychiatric review	2	Accepted	Entirely	2
27 décembre 2024	Yes	Yes	39	Male	Schizophrenia	Cannabis use disorder	Auditory hallucinations, disorganized behavior, noncompliance with medication, aggression toward staff	Yes	Cannabis, alcohol	Treatment and housing	Invega Trinza, community supervision, housing support	Urine toxicology, psychiatric reviews	2	Accepted	Entirely	2
23 décembre 2024	Yes	Not specified	60	Female	Schizoaffective disorder	Diabetes	Paranoia, emotional instability, neglect of health, delusions, refusal to engage with care team	No		Treatment and housing	Risperdal Consta, medical monitoring, community follow-up	Blood glucose testing, psychiatric evaluation	1	Accepted	Entirely	1
20 décembre 2024	Yes	Yes	44	Male	Paranoid schizophrenia	None listed	Delusional thoughts, verbal aggression, resistance to treatment, social withdrawal	No		Treatment order	Invega Sustenna, psychiatric follow-up	Blood work, psychiatric assessments	2	Accepted	Entirely	2
18 décembre 2024	Yes	Yes	29	Female	Bipolar I disorder	None	Elevated mood, decreased need for sleep, pressured speech, disorganized behavior	Yes	Cannabis	Treatment and housing	Abilify Maintena, SIM team follow-up, community monitoring	Urine drug testing, psychiatric evaluation	2	Accepted	Partially	1
16 décembre 2024	Yes	Yes	36	Male	Schizoaffective disorder	Substance use disorder	Hallucinations, disorganized thought process, substance-induced crises, impulsivity	Yes	Cannabis, alcohol, cocaine	Treatment order	Abilify injection, addiction services, community supervision	Urine toxicology, psychiatric monitoring	3	Accepted	Partially	2
13 décembre 2024	Yes	Yes	51	Female	Paranoid schizophrenia	None	Persecutory delusions, social isolation, refusal to take medication, lack of insight, impaired functioning	No		Treatment order	Risperdal Consta, psychiatric nurse visits, community support	Psychiatric monitoring, lab tests	2	Accepted	Entirely	2
11 décembre 2024	Yes	Not specified	33	Male	Bipolar disorder with psychotic features	Substance use disorder	Manic symptoms, hallucinations, erratic behavior, substance-related relapses	Yes	Cannabis, alcohol	Treatment and housing	Abilify Maintena, community outreach, addiction services	Urine testing, psychiatric follow-ups	3	Accepted	Partially	2
9 décembre 2024	Yes	Yes	28	Female	Schizoaffective disorder	PTSD	Auditory hallucinations, trauma-related anxiety, emotional dysregulation, disorganized behavior	Yes	Cannabis	Treatment and housing	Invega Trinza, trauma-informed therapy, housing support	Urine screening, psychiatric evaluations	2	Accepted	Entirely	2
6 décembre 2024	Yes	Yes	57	Male	Schizophrenia	Cognitive impairment	Disorganized speech, poor hygiene, confusion, memory lapses, frequent psychiatric relapses	No		Treatment and housing	Risperdal Consta, neurocognitive assessment, medical supervision	Cognitive testing, psychiatric reviews	1	Accepted	Entirely	1
4 décembre 2024	Yes	Yes	47	Female	Bipolar disorder	None	Mania, grandiosity, pressured speech, impaired judgment, recent hospitalization	Yes	Cannabis, alcohol	Treatment order	Abilify injection, psychiatric follow-up, community liaison	Toxicology testing, psychiatric check-ins	3	Accepted	Partially	2
2 décembre 2024	Yes	Yes	34	Male	Schizoaffective disorder	Substance use disorder	Delusions, hallucinations, impulsivity, verbal threats, recurrent relapses	Yes	Cannabis, alcohol, cocaine	Treatment order	Abilify Maintena, addiction monitoring, community supervision	Urine toxicology, psychiatric reviews	2	Accepted	Entirely	2
29 novembre 2024	Yes	Yes	53	Female	Schizophrenia	Hypertension	Delusional beliefs, disorganized thought process, non-compliance with care plan	No	N/A	Treatment and housing	Invega Trinza, medical monitoring, psychiatric oversight	Blood pressure tracking, psychiatric check-ins	1	Accepted	Entirely	1
27 novembre 2024	Yes	Not specified	40	Male	Bipolar disorder with psychotic features	None listed	Elevated mood, pressured speech, grandiosity, poor judgment, recent decompensation	Yes	Cannabis	Treatment and housing	Abilify injection, SIM team, housing support	Urine testing, psychiatric monitoring	3	Accepted	Partially	2
25 novembre 2024	Yes	Yes	37	Female	Schizoaffective disorder	PTSD	Hallucinations, anxiety, poor impulse control, resistance to care	Yes	Cannabis, alcohol	Treatment and housing	Risperdal Consta, trauma therapy, supervised residence	Psychiatric evaluations, urine toxicology	2	Accepted	Entirely	2
